# Supplementary material
Source: Springer Nature journal article supplement (https://www.springermedizin.de/resource/supplementary/12906_2001_15_MOESM3_ESM.pdf/9523840)

# Treatment groups

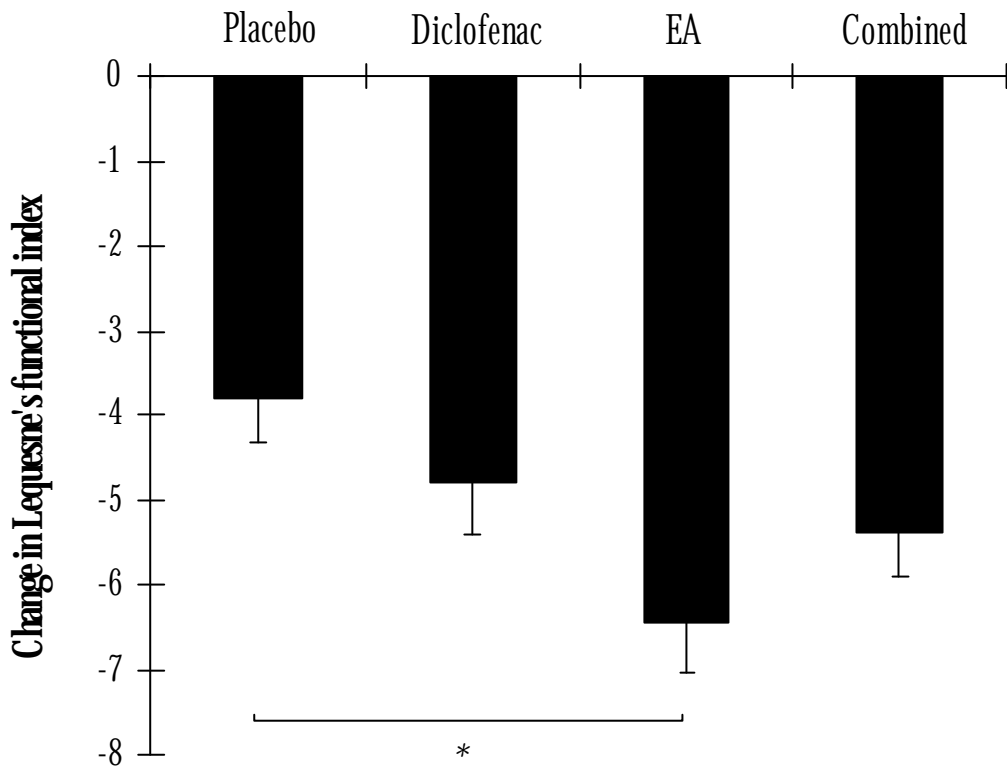

Supplement: MOESM3 [file 9523840]
